# Supplementary material for: ‘One pot’ synthesis of well-defined poly(aminophosphonate)s: time for the Kabachnik–Fields reaction on the stage of polymer chemistry
Source: Royal Society of Chemistry journal article supplement (doi:10.1039/c3py01486j), 2013-11-11
Supplement: c3py01486j.pdf [file c3py01486j.pdf]

## Supporting information

# **‘One Pot’ Synthesis of Well-defined Poly(aminophosphonate)s: Time for Kabachnik-Fields Reaction on Stage of Polymer Chemistry**

**Yaling Zhang, Yuan Zhao, Bin Yang, Chongyu Zhu, Yen Wei  
and Lei Tao\***

*The Key Laboratory of Bioorganic Phosphorus Chemistry & Chemical Biology  
(Ministry of Education), Department of Chemistry, Tsinghua University, Beijing  
100084, P. R. China.*

Tel: (+) 86-10-62792604, Fax: (+) 86-10-62794694

E-mail: [leitao@mail.tsinghua.edu.cn](mailto:leitao@mail.tsinghua.edu.cn)

## Experimental Section

### 1. Materials

N-(3-aminopropyl) methacrylamide (APMA, Tongchuang Pharma Co., Ltd, 98%), benzaldehyde (Aladdin, 99%), diethyl phosphite (Aladdin, 99%), triethylamine (TEA, Sinopharm Chemical Reagent, AR), 1,8-diazabicyclo[5.4.0]undec-7-ene (DBU, Sinopharm Chemical Reagent, 99%), 4-hydroxybenzaldehyde (Aladdin, 98%), 4-dimethylaminobenzaldehyde (Aladdin, 98%), 2-pyridylaldehyde (Aladdin, 98%), trans-cinnamaldehyde (Sinopharm Chemical Reagent, 98%), hexanaldehyde (Aladdin, 97%), and 2,2'-azobis(2,4-dimethylvaleronitrile) (ABVN, J&K Chemical, 97%) were all used as purchased. 4-cyano-4-(ethylthiocarbonylthio) pentanoic acid using as chain transfer agent (CTA) and polyAPMA were synthesized as reported<sup>[1,2]</sup>. Solvents as acetonitrile, ethanol, and methanol were purchased from Sinopharm Chemical Reagent and used directly without further purification.

### 2. Instrumental Analysis

Gel permeation chromatography (GPC) analyses of polymers were performed using N, N-dimethyl formamide (DMF) as the eluent. The GPC system was a Shimadzu LC-20AD pump system consisting of an auto injector, a MZ-Gel SDplus 10.0  $\mu\text{m}$  guard column (50  $\times$  8.0 mm, 10<sup>2</sup> Å) followed by a MZ-Gel SDplus 5.0  $\mu\text{m}$  bead-size column (50 – 10<sup>6</sup> Å, linear) and a Shimadzu RID-10A refractive index detector. The system was calibrated with narrow molecular weight distribution polystyrene standards ranging from 200 to 10<sup>6</sup> g mol<sup>-1</sup>. <sup>1</sup>H NMR and <sup>13</sup>C NMR spectra were obtained using a JEOL JNM-ECA400 (400 MHz) spectrometer for all samples. The ESI-MS data were collected using a Micro TOF-QII Bruker. The FT-IR spectra were made in a transmission mode on a Perkin-Elmer Spectrum 100 spectrometer.

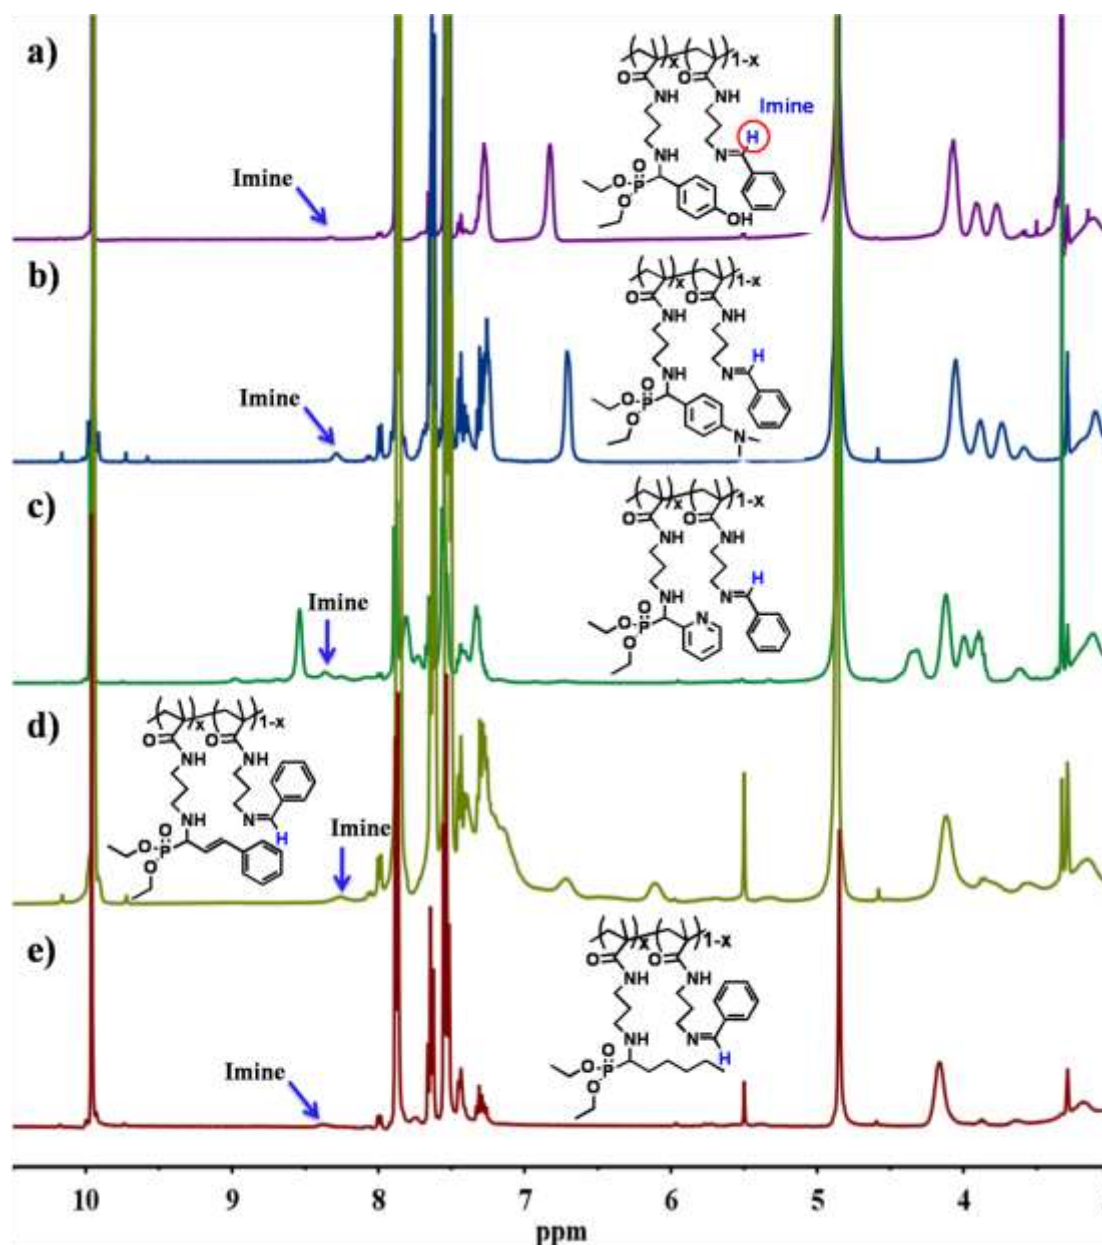

**Figure S1.**  $^1\text{H}$ -NMR spectra of various polyAPPs a) 4-hydroxybenzaldehyde, b) 4-dimethylaminobenzaldehyde, c) 2-pyridylaldehyde, d) *trans*-cinnamaldehyde, e) hexanaldehyde after adding excess benzaldehyde for the modification efficiency calculation.

## Reference

1. L. Tao, J. Liu and T. P. Davis, *Biomacromolecules*, 2009, **10**, 2847-2851.
2. Z. Deng, H. Bouchékif, and K. Babooram, *Journal of Polymer Science Part A: Polymer Chemistry*, 2008, **46**, 4984-4996.
